# Supplementary material
Source: PubMed Central journal article supplement (PMC3005772)
Supplement: NIHMS253761-supplement-supp_info.pdf [file NIHMS253761-supplement-supp_info.pdf]

## CORRIGENDUM

**MUC4 mucin-induced epithelial to mesenchymal transition: a novel mechanism for metastasis of human ovarian cancer cells**

MP Ponnusamy, I Lakshmanan, M Jain, S Das, S Chakraborty, P Dey and SK Batra

*Oncogene* (2010) 29, 6084; doi:10.1038/onc.2010.472**Correction to:** *Oncogene* (2010) 29, 5741–5754; doi:10.1038/onc.2010.309; published online 9 August 2010

After the publication of the article, the authors noticed a minor error in Figure 1a panel 1 (MUC4 confocal image

switched between SKOV3-Vector and SKOV3-MUC4). The authors would like to apologize for this mistake. The correct figure is reproduced below.

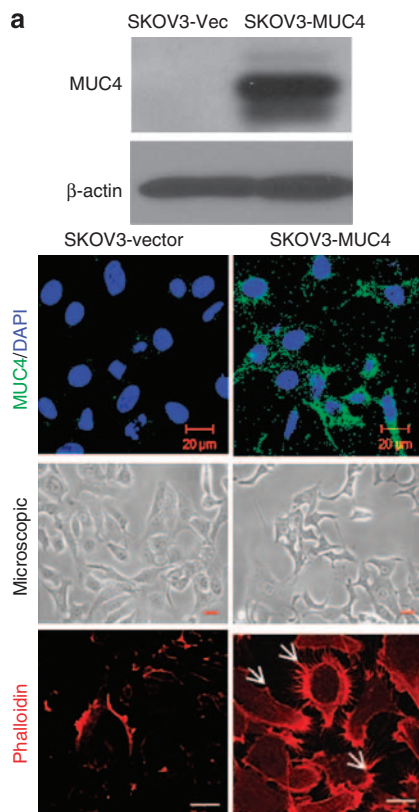**Figure 1**
